# Supplementary material
Source: publisher figshare collection journal article supplement (https://acs.figshare.com/ndownloader/files/5745030)
Supplement: Supplementary file 1 [file 5745030]

 
data_tisa 
  
_audit_creation_method            SHELXL-97 
_chemical_name_systematic 
; 
 ? 
; 
_chemical_name_common             ? 
_chemical_melting_point           ? 
_chemical_formula_moiety          ? 
_chemical_formula_sum 
 'C17 H20 O2' 
_chemical_formula_weight          256.33 
  
loop_ 
 _atom_type_symbol 
 _atom_type_description 
 _atom_type_scat_dispersion_real 
 _atom_type_scat_dispersion_imag 
 _atom_type_scat_source 
 'C'  'C'   0.0033   0.0016 
 'International Tables Vol C Tables 4.2.6.8 and 6.1.1.4' 
 'H'  'H'   0.0000   0.0000 
 'International Tables Vol C Tables 4.2.6.8 and 6.1.1.4' 
 'O'  'O'   0.0106   0.0060 
 'International Tables Vol C Tables 4.2.6.8 and 6.1.1.4' 
  
_symmetry_cell_setting            monoclinic 
_symmetry_space_group_name_H-M    P2(1)/c 
  
loop_ 
 _symmetry_equiv_pos_as_xyz 
 'x, y, z' 
 '-x, y+1/2, -z+1/2' 
 '-x, -y, -z' 
 'x, -y-1/2, z-1/2' 
  
_cell_length_a                    9.6500(10) 
_cell_length_b                    9.8364(12) 
_cell_length_c                    14.5720(17) 
_cell_angle_alpha                 90.00 
_cell_angle_beta                  91.676(3) 
_cell_angle_gamma                 90.00 
_cell_volume                      1382.6(3) 
_cell_formula_units_Z             4 
_cell_measurement_temperature     295(2) 
_cell_measurement_reflns_used     800 
_cell_measurement_theta_min       2.5 
_cell_measurement_theta_max       25.5 
  
_exptl_crystal_description        'parallelopiped' 
_exptl_crystal_colour             colorless 
_exptl_crystal_size_max           0.30 
_exptl_crystal_size_mid           0.30 
_exptl_crystal_size_min           0.15 
_exptl_crystal_density_meas       ? 
_exptl_crystal_density_diffrn     1.231 
_exptl_crystal_density_method     'not measured' 
_exptl_crystal_F_000              552 
_exptl_absorpt_coefficient_mu     0.079 
_exptl_absorpt_correction_type    Multi-scan 
_exptl_absorpt_correction_T_min   0.9767 
_exptl_absorpt_correction_T_max   0.9883 
_exptl_absorpt_process_details    ? 
  
_exptl_special_details 
; 
 ? 
; 
  
_diffrn_ambient_temperature       295(2) 
_diffrn_radiation_wavelength      0.71073 
_diffrn_radiation_type            MoK\a 
_diffrn_radiation_source          'fine-focus sealed tube' 
_diffrn_radiation_monochromator   graphite 
_diffrn_measurement_device_type   ? 
_diffrn_measurement_method        'SMART CCD' 
_diffrn_detector_area_resol_mean  ? 
_diffrn_standards_number          ? 
_diffrn_standards_interval_count  ? 
_diffrn_standards_interval_time   ? 
_diffrn_standards_decay_%         ? 
_diffrn_reflns_number             9962 
_diffrn_reflns_av_R_equivalents   0.031 
_diffrn_reflns_av_sigmaI/netI     0.0358 
_diffrn_reflns_limit_h_min        -12 
_diffrn_reflns_limit_h_max        12 
_diffrn_reflns_limit_k_min        0 
_diffrn_reflns_limit_k_max        13 
_diffrn_reflns_limit_l_min        0 
_diffrn_reflns_limit_l_max        19 
_diffrn_reflns_theta_min          2.11 
_diffrn_reflns_theta_max          28.29 
_reflns_number_total              3191 
_reflns_number_gt                 1957 
_reflns_threshold_expression      >2sigma(I) 
  
_computing_data_collection        'Bruker SMART' 
_computing_cell_refinement        'Bruker SAINT' 
_computing_data_reduction         'Bruker SAINT' 
_computing_structure_solution     'SHELXS-97 (Sheldrick, 1990)' 
_computing_structure_refinement   'SHELXL-97 (Sheldrick, 1997)' 
_computing_molecular_graphics     SHELXTL-Plus 
_computing_publication_material   SHELXL-93 
  
_refine_special_details 
; 
 Refinement of F^2^ against ALL reflections.  The weighted R-factor wR and 
 goodness of fit S are based on F^2^, conventional R-factors R are based 
 on F, with F set to zero for negative F^2^. The threshold expression of 
 F^2^ > 2sigma(F^2^) is used only for calculating R-factors(gt) etc. and is 
 not relevant to the choice of reflections for refinement.  R-factors based 
 on F^2^ are statistically about twice as large as those based on F, and R- 
 factors based on ALL data will be even larger. 
; 
  
_refine_ls_structure_factor_coef  Fsqd 
_refine_ls_matrix_type            full 
_refine_ls_weighting_scheme       calc 
_refine_ls_weighting_details 
 'calc w=1/[\s^2^(Fo^2^)+(0.0769P)^2^+0.0000P] where P=(Fo^2^+2Fc^2^)/3' 
_atom_sites_solution_primary      direct 
_atom_sites_solution_secondary    difmap 
_atom_sites_solution_hydrogens    geom 
_refine_ls_hydrogen_treatment     mixed 
_refine_ls_extinction_method      SHELXL 
_refine_ls_extinction_coef        0.004(2) 
_refine_ls_extinction_expression 
 'Fc^*^=kFc[1+0.001xFc^2^\l^3^/sin(2\q)]^-1/4^' 
_refine_ls_number_reflns          3191 
_refine_ls_number_parameters      253 
_refine_ls_number_restraints      0 
_refine_ls_R_factor_all           0.0880 
_refine_ls_R_factor_gt            0.0480 
_refine_ls_wR_factor_ref          0.1328 
_refine_ls_wR_factor_gt           0.1172 
_refine_ls_goodness_of_fit_ref    0.971 
_refine_ls_restrained_S_all       0.971 
_refine_ls_shift/su_max           0.000 
_refine_ls_shift/su_mean          0.000 
  
loop_ 
 _atom_site_label 
 _atom_site_type_symbol 
 _atom_site_fract_x 
 _atom_site_fract_y 
 _atom_site_fract_z 
 _atom_site_U_iso_or_equiv 
 _atom_site_adp_type 
 _atom_site_occupancy 
 _atom_site_symmetry_multiplicity 
 _atom_site_calc_flag 
 _atom_site_refinement_flags 
 _atom_site_disorder_assembly 
 _atom_site_disorder_group 
O1 O 0.60042(14) 0.11248(14) 0.25172(9) 0.0601(4) Uani 1 1 d . . . 
O2 O 0.54357(14) 0.37411(14) 0.24432(9) 0.0589(4) Uani 1 1 d . . . 
C1 C 0.72242(17) 0.14608(15) 0.20276(11) 0.0386(4) Uani 1 1 d . . . 
C2 C 0.71347(16) 0.27657(15) 0.14223(11) 0.0377(4) Uani 1 1 d . . . 
C3 C 0.58190(17) 0.36252(18) 0.15092(13) 0.0456(4) Uani 1 1 d . . . 
C4 C 0.47733(19) 0.2913(2) 0.08705(15) 0.0602(5) Uani 1 1 d . . . 
C5 C 0.56009(19) 0.2541(2) 0.00422(14) 0.0555(5) Uani 1 1 d . . . 
C6 C 0.71081(15) 0.22632(15) 0.04220(11) 0.0392(4) Uani 1 1 d . . . 
C7 C 0.8207(2) 0.2734(2) -0.02475(13) 0.0517(5) Uani 1 1 d . . . 
C8 C 0.8252(2) 0.1579(2) -0.09481(14) 0.0564(5) Uani 1 1 d . . . 
C9 C 0.7963(2) 0.0270(2) -0.04052(12) 0.0503(5) Uani 1 1 d . . . 
C10 C 0.74690(15) 0.07800(16) 0.05021(11) 0.0380(4) Uani 1 1 d . . . 
C11 C 0.75429(14) 0.03288(15) 0.13661(11) 0.0362(4) Uani 1 1 d . . . 
C12 C 0.79361(15) -0.10373(15) 0.16937(12) 0.0391(4) Uani 1 1 d . . . 
C13 C 0.79070(19) -0.21644(17) 0.11045(15) 0.0526(5) Uani 1 1 d . . . 
C14 C 0.8328(2) -0.3434(2) 0.14089(19) 0.0658(6) Uani 1 1 d . . . 
C15 C 0.8758(2) -0.3619(2) 0.23077(19) 0.0703(7) Uani 1 1 d . . . 
C16 C 0.8775(2) -0.2539(2) 0.28997(18) 0.0653(6) Uani 1 1 d . . . 
C17 C 0.83643(19) -0.1261(2) 0.26021(14) 0.0508(5) Uani 1 1 d . . . 
H01 H 0.564(2) 0.189(2) 0.2706(14) 0.078(7) Uiso 1 1 d . . . 
H02 H 0.492(2) 0.449(3) 0.2552(15) 0.093(8) Uiso 1 1 d . . . 
H1 H 0.7981(16) 0.1577(15) 0.2492(10) 0.038(4) Uiso 1 1 d . . . 
H2 H 0.8009(17) 0.3295(17) 0.1558(10) 0.045(4) Uiso 1 1 d . . . 
H3 H 0.5986(16) 0.4562(17) 0.1270(10) 0.046(5) Uiso 1 1 d . . . 
H4A H 0.398(2) 0.345(2) 0.0749(14) 0.069(6) Uiso 1 1 d . . . 
H4B H 0.444(2) 0.206(2) 0.1212(14) 0.078(7) Uiso 1 1 d . . . 
H5A H 0.566(2) 0.336(2) -0.0422(14) 0.069(6) Uiso 1 1 d . . . 
H5B H 0.525(2) 0.174(2) -0.0318(14) 0.077(6) Uiso 1 1 d . . . 
H7A H 0.910(2) 0.2851(18) 0.0101(13) 0.059(5) Uiso 1 1 d . . . 
H7B H 0.801(2) 0.363(2) -0.0512(14) 0.076(6) Uiso 1 1 d . . . 
H8A H 0.910(2) 0.155(2) -0.1259(13) 0.070(6) Uiso 1 1 d . . . 
H8B H 0.751(2) 0.166(2) -0.1408(14) 0.072(6) Uiso 1 1 d . . . 
H9A H 0.877(2) -0.036(2) -0.0341(12) 0.070(6) Uiso 1 1 d . . . 
H9B H 0.728(2) -0.029(2) -0.0729(13) 0.067(6) Uiso 1 1 d . . . 
H13 H 0.756(2) -0.2046(19) 0.0462(14) 0.066(6) Uiso 1 1 d . . . 
H14 H 0.831(2) -0.418(2) 0.0998(15) 0.083(7) Uiso 1 1 d . . . 
H15 H 0.903(2) -0.449(2) 0.2508(13) 0.076(6) Uiso 1 1 d . . . 
H16 H 0.906(2) -0.262(2) 0.3555(16) 0.080(7) Uiso 1 1 d . . . 
H17 H 0.8391(19) -0.0536(19) 0.3027(13) 0.062(6) Uiso 1 1 d . . . 
  
loop_ 
 _atom_site_aniso_label 
 _atom_site_aniso_U_11 
 _atom_site_aniso_U_22 
 _atom_site_aniso_U_33 
 _atom_site_aniso_U_23 
 _atom_site_aniso_U_13 
 _atom_site_aniso_U_12 
O1 0.0724(9) 0.0374(7) 0.0723(10) -0.0002(6) 0.0355(7) -0.0033(6) 
O2 0.0652(8) 0.0507(8) 0.0614(9) -0.0081(6) 0.0118(6) 0.0162(6) 
C1 0.0450(9) 0.0325(8) 0.0384(9) 0.0003(7) 0.0034(7) -0.0010(7) 
C2 0.0387(8) 0.0298(8) 0.0446(10) -0.0004(7) 0.0016(7) -0.0027(7) 
C3 0.0495(9) 0.0357(9) 0.0518(11) -0.0023(8) 0.0034(8) 0.0060(7) 
C4 0.0409(10) 0.0699(14) 0.0695(14) -0.0073(11) -0.0048(9) 0.0098(10) 
C5 0.0521(10) 0.0629(13) 0.0509(12) -0.0010(11) -0.0079(9) 0.0103(9) 
C6 0.0410(8) 0.0373(9) 0.0391(9) 0.0043(7) -0.0002(7) 0.0012(7) 
C7 0.0572(11) 0.0490(12) 0.0492(11) 0.0098(9) 0.0087(9) -0.0026(9) 
C8 0.0567(11) 0.0703(14) 0.0426(11) 0.0017(10) 0.0086(9) -0.0015(10) 
C9 0.0579(11) 0.0508(11) 0.0421(11) -0.0080(9) 0.0018(8) 0.0029(9) 
C10 0.0352(8) 0.0370(9) 0.0415(10) -0.0042(7) -0.0005(7) -0.0033(6) 
C11 0.0367(8) 0.0324(8) 0.0394(9) -0.0013(7) 0.0010(6) -0.0018(6) 
C12 0.0353(7) 0.0327(9) 0.0495(10) 0.0023(7) 0.0047(7) -0.0009(6) 
C13 0.0546(10) 0.0356(10) 0.0674(14) -0.0033(9) 0.0013(9) -0.0024(8) 
C14 0.0690(13) 0.0331(11) 0.0960(18) -0.0024(11) 0.0126(12) -0.0042(9) 
C15 0.0650(13) 0.0388(12) 0.107(2) 0.0235(13) 0.0109(12) 0.0058(10) 
C16 0.0668(13) 0.0569(14) 0.0722(16) 0.0264(12) 0.0004(11) 0.0004(10) 
C17 0.0575(11) 0.0441(11) 0.0510(12) 0.0071(9) 0.0039(9) -0.0010(8) 
  
_geom_special_details 
; 
 All esds (except the esd in the dihedral angle between two l.s. planes) 
 are estimated using the full covariance matrix.  The cell esds are taken 
 into account individually in the estimation of esds in distances, angles 
 and torsion angles; correlations between esds in cell parameters are only 
 used when they are defined by crystal symmetry.  An approximate (isotropic) 
 treatment of cell esds is used for estimating esds involving l.s. planes. 
; 
  
loop_ 
 _geom_bond_atom_site_label_1 
 _geom_bond_atom_site_label_2 
 _geom_bond_distance 
 _geom_bond_site_symmetry_2 
 _geom_bond_publ_flag 
O1 C1 1.433(2) . ? 
O2 C3 1.425(2) . ? 
C1 C11 1.510(2) . ? 
C1 C2 1.558(2) . ? 
C2 C3 1.534(2) . ? 
C2 C6 1.539(2) . ? 
C3 C4 1.523(3) . ? 
C4 C5 1.512(3) . ? 
C5 C6 1.565(2) . ? 
C6 C10 1.504(2) . ? 
C6 C7 1.534(2) . ? 
C7 C8 1.529(3) . ? 
C8 C9 1.542(3) . ? 
C9 C10 1.505(2) . ? 
C10 C11 1.335(2) . ? 
C11 C12 1.472(2) . ? 
C12 C17 1.393(2) . ? 
C12 C13 1.402(2) . ? 
C13 C14 1.382(3) . ? 
C14 C15 1.374(3) . ? 
C15 C16 1.369(3) . ? 
C16 C17 1.384(3) . ? 
  
loop_ 
 _geom_angle_atom_site_label_1 
 _geom_angle_atom_site_label_2 
 _geom_angle_atom_site_label_3 
 _geom_angle 
 _geom_angle_site_symmetry_1 
 _geom_angle_site_symmetry_3 
 _geom_angle_publ_flag 
O1 C1 C11 109.47(12) . . ? 
O1 C1 C2 116.04(13) . . ? 
C11 C1 C2 104.77(13) . . ? 
C3 C2 C6 105.33(13) . . ? 
C3 C2 C1 116.08(14) . . ? 
C6 C2 C1 105.71(12) . . ? 
O2 C3 C4 115.75(15) . . ? 
O2 C3 C2 111.19(14) . . ? 
C4 C3 C2 103.37(14) . . ? 
C5 C4 C3 104.08(15) . . ? 
C4 C5 C6 105.49(15) . . ? 
C10 C6 C7 100.35(13) . . ? 
C10 C6 C2 103.93(12) . . ? 
C7 C6 C2 120.86(14) . . ? 
C10 C6 C5 114.03(14) . . ? 
C7 C6 C5 112.04(15) . . ? 
C2 C6 C5 105.58(13) . . ? 
C8 C7 C6 103.54(15) . . ? 
C7 C8 C9 105.61(15) . . ? 
C10 C9 C8 103.83(15) . . ? 
C11 C10 C6 113.68(13) . . ? 
C11 C10 C9 135.10(15) . . ? 
C6 C10 C9 109.52(14) . . ? 
C10 C11 C12 127.98(14) . . ? 
C10 C11 C1 110.53(13) . . ? 
C12 C11 C1 121.43(14) . . ? 
C17 C12 C13 117.22(16) . . ? 
C17 C12 C11 121.25(15) . . ? 
C13 C12 C11 121.53(16) . . ? 
C14 C13 C12 121.2(2) . . ? 
C15 C14 C13 120.2(2) . . ? 
C16 C15 C14 119.7(2) . . ? 
C15 C16 C17 120.7(2) . . ? 
C16 C17 C12 121.0(2) . . ? 
  
loop_ 
 _geom_torsion_atom_site_label_1 
 _geom_torsion_atom_site_label_2 
 _geom_torsion_atom_site_label_3 
 _geom_torsion_atom_site_label_4 
 _geom_torsion 
 _geom_torsion_site_symmetry_1 
 _geom_torsion_site_symmetry_2 
 _geom_torsion_site_symmetry_3 
 _geom_torsion_site_symmetry_4 
 _geom_torsion_publ_flag 
O1 C1 C2 C3 6.9(2) . . . . ? 
C11 C1 C2 C3 127.74(14) . . . . ? 
O1 C1 C2 C6 -109.42(15) . . . . ? 
C11 C1 C2 C6 11.41(16) . . . . ? 
C6 C2 C3 O2 158.59(13) . . . . ? 
C1 C2 C3 O2 42.05(19) . . . . ? 
C6 C2 C3 C4 33.75(18) . . . . ? 
C1 C2 C3 C4 -82.78(18) . . . . ? 
O2 C3 C4 C5 -162.68(15) . . . . ? 
C2 C3 C4 C5 -40.9(2) . . . . ? 
C3 C4 C5 C6 31.9(2) . . . . ? 
C3 C2 C6 C10 -134.42(13) . . . . ? 
C1 C2 C6 C10 -11.01(15) . . . . ? 
C3 C2 C6 C7 114.25(17) . . . . ? 
C1 C2 C6 C7 -122.34(16) . . . . ? 
C3 C2 C6 C5 -14.10(18) . . . . ? 
C1 C2 C6 C5 109.31(15) . . . . ? 
C4 C5 C6 C10 102.53(18) . . . . ? 
C4 C5 C6 C7 -144.35(16) . . . . ? 
C4 C5 C6 C2 -10.9(2) . . . . ? 
C10 C6 C7 C8 40.95(18) . . . . ? 
C2 C6 C7 C8 154.17(15) . . . . ? 
C5 C6 C7 C8 -80.41(19) . . . . ? 
C6 C7 C8 C9 -33.5(2) . . . . ? 
C7 C8 C9 C10 11.9(2) . . . . ? 
C7 C6 C10 C11 132.57(14) . . . . ? 
C2 C6 C10 C11 6.94(16) . . . . ? 
C5 C6 C10 C11 -107.50(16) . . . . ? 
C7 C6 C10 C9 -34.85(16) . . . . ? 
C2 C6 C10 C9 -160.48(13) . . . . ? 
C5 C6 C10 C9 85.08(17) . . . . ? 
C8 C9 C10 C11 -148.92(18) . . . . ? 
C8 C9 C10 C6 14.67(18) . . . . ? 
C6 C10 C11 C12 -176.68(14) . . . . ? 
C9 C10 C11 C12 -13.6(3) . . . . ? 
C6 C10 C11 C1 0.48(17) . . . . ? 
C9 C10 C11 C1 163.57(17) . . . . ? 
O1 C1 C11 C10 117.47(14) . . . . ? 
C2 C1 C11 C10 -7.61(17) . . . . ? 
O1 C1 C11 C12 -65.15(18) . . . . ? 
C2 C1 C11 C12 169.76(13) . . . . ? 
C10 C11 C12 C17 160.69(16) . . . . ? 
C1 C11 C12 C17 -16.2(2) . . . . ? 
C10 C11 C12 C13 -18.8(2) . . . . ? 
C1 C11 C12 C13 164.35(15) . . . . ? 
C17 C12 C13 C14 -2.0(3) . . . . ? 
C11 C12 C13 C14 177.52(16) . . . . ? 
C12 C13 C14 C15 1.4(3) . . . . ? 
C13 C14 C15 C16 -0.4(3) . . . . ? 
C14 C15 C16 C17 0.0(3) . . . . ? 
C15 C16 C17 C12 -0.6(3) . . . . ? 
C13 C12 C17 C16 1.5(3) . . . . ? 
C11 C12 C17 C16 -177.94(16) . . . . ? 
  
_diffrn_measured_fraction_theta_max    0.930 
_diffrn_reflns_theta_full              28.29 
_diffrn_measured_fraction_theta_full   0.930 
_refine_diff_density_max    0.222 
_refine_diff_density_min   -0.185 
_refine_diff_density_rms    0.033 
